# Supplementary material for: Phase Behavior of NR/PMMA Semi-IPNs and Development of Porous Structures
Source: MDPI journal article supplement (doi:10.3390/polym15061353), 2023-03-08
Supplement: s1 [file s1]

## Supplementary Material: Phase Behavior of NR/PMMA Semi-IPNs and Development of Porous Structures

Jacob John, Damir Klepac, Mia Kurek, Mario Ščetar, Kata Galić, Srećko Valić, Sabu Thomas, Anitha Pius

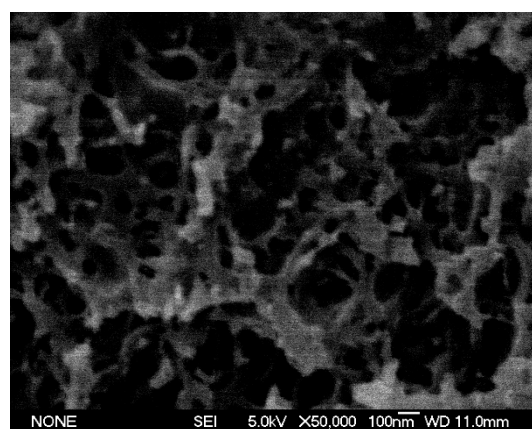

(a)

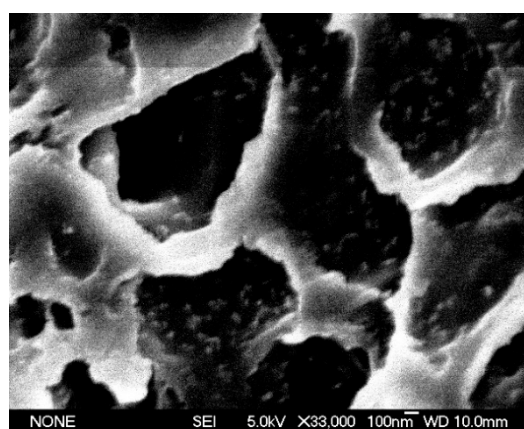

(b)

Figure S1. SEM images of blends (a) NRM<sub>50</sub> and (b) NRM<sub>65</sub>.
